# Supplementary material for: Peripheral Inflammatory Cytokines and Lymphocyte Subset Features of Deceased COVID‐19 Patients
Source: Hindawi journal article supplement (doi:10.1155/2021/9101082), 2021-01-01
Supplement: f1 [file 9101082.f1.pdf]

Supplementary file: Correlation coefficient and p value between cytokines profiles and lymphocyte subsets in COVID-19

|              | lower        | r            | upper        | p.value     |
|--------------|--------------|--------------|--------------|-------------|
| Leu-Neu      | 0.906445933  | 0.925562654  | 0.940894196  | 2.53E-116   |
| Leu-Lym      | -0.220049245 | -0.104050293 | 0.014850268  | 0.086168408 |
| Leu-Mono     | 0.226299881  | 0.335990395  | 0.437265935  | 1.25E-08    |
| Leu-Plat     | -0.033926664 | 0.085133348  | 0.201810811  | 0.160698167 |
| Leu-Glu      | 0.090060299  | 0.208298449  | 0.320746451  | 0.000644104 |
| Leu-LDH      | 0.212781343  | 0.323728618  | 0.426434457  | 4.98E-08    |
| Leu-CRP      | 0.210319437  | 0.326796311  | 0.434125447  | 1.57E-07    |
| Leu-IL1β     | -0.032454538 | 0.090993498  | 0.211706951  | 0.148164244 |
| Leu-IL2R     | 0.108507063  | 0.228539345  | 0.342003452  | 0.000239643 |
| Leu-IL6      | 0.146559277  | 0.26463738   | 0.375280061  | 1.85E-05    |
| Leu-IL8      | 0.07056599   | 0.191983054  | 0.307794376  | 0.002117391 |
| Leu-IL10     | 0.014932449  | 0.137763794  | 0.256498994  | 0.028146282 |
| Leu-TNFα     | 0.047262197  | 0.169361529  | 0.286474295  | 0.006821467 |
| Leu-T cells  | -0.293551148 | -0.132351744 | 0.036166549  | 0.12313828  |
| Leu-B cells  | -0.234647249 | -0.069673699 | 0.099200988  | 0.418502881 |
| Leu-Th cells | -0.283890733 | -0.121983216 | 0.046687425  | 0.155606674 |
| Leu-Ts cells | -0.372128176 | -0.218019657 | -0.052213365 | 0.010487184 |
| Leu-NK cells | -0.383310126 | -0.230406811 | -0.065211268 | 0.006755207 |
| Leu-Th/Tr    | -0.049402783 | 0.119301189  | 0.28138651   | 0.164968267 |
| Leu-NLR      | 0.554145677  | 0.631329773  | 0.69775072   | 9.15E-32    |
| Neu-Lym      | -0.437530876 | -0.336280998 | -0.2266107   | 1.22E-08    |
| Neu-Mono     | 0.113355898  | 0.228991417  | 0.33850618   | 0.000135062 |
| Neu-Plat     | -0.07799087  | 0.041106854  | 0.159047809  | 0.498808169 |
| Neu-Glu      | 0.183706917  | 0.297617365  | 0.40364045   | 8.05E-07    |
| Neu-LDH      | 0.342374206  | 0.443438921  | 0.534359516  | 1.75E-14    |
| Neu-CRP      | 0.303404552  | 0.41281258   | 0.511477418  | 1.53E-11    |
| Neu-IL1β     | -0.06816637  | 0.055382854  | 0.177259068  | 0.379412865 |
| Neu-IL2R     | 0.222905376  | 0.336750761  | 0.441534238  | 3.76E-08    |
| Neu-IL6      | 0.226867925  | 0.34022864   | 0.44449378   | 2.50E-08    |
| Neu-IL8      | 0.111813952  | 0.231709582  | 0.34495603   | 0.000194963 |
| Neu-IL10     | 0.10235614   | 0.22263582   | 0.33649927   | 0.000349276 |
| Neu-TNFα     | 0.117860078  | 0.237499283  | 0.350342449  | 0.00013277  |
| Neu-T cells  | -0.441889258 | -0.296119696 | -0.135114517 | 0.00044246  |
| Neu-B cells  | -0.357698955 | -0.202108277 | -0.035599495 | 0.017863399 |
| Neu-Th cells | -0.426741621 | -0.278994067 | -0.116741085 | 0.000961941 |
| Neu-Ts cells | -0.493271341 | -0.354917946 | -0.199051017 | 2.09E-05    |
| Neu-NK cells | -0.475368168 | -0.334305742 | -0.176485487 | 6.54E-05    |
| Neu-Th/Tr    | -0.035687344 | 0.132823133  | 0.293989563  | 0.121797174 |
| Neu-NLR      | 0.774913369  | 0.818346324  | 0.854087387  | 3.85E-67    |
| Lym-Mono     | 0.203683082  | 0.31478841   | 0.417888707  | 1.08E-07    |
| Lym-Plat     | 0.246111431  | 0.354471726  | 0.454080303  | 1.67E-09    |
| Lym-Glu      | -0.411823092 | -0.306536038 | -0.193172655 | 3.59E-07    |
| Lym-LDH      | -0.633141367 | -0.555926497 | -0.467756276 | 2.20E-23    |
| Lym-CRP      | -0.554131828 | -0.461009721 | -0.356491677 | 2.39E-14    |
| Lym-IL1β     | -0.059046538 | 0.064506828  | 0.186113673  | 0.305804224 |
| Lym-IL2R     | -0.525560419 | -0.430312055 | -0.324409794 | 7.15E-13    |
| Lym-IL6      | -0.527291847 | -0.432461496 | -0.326990184 | 4.81E-13    |
| Lym-IL8      | -0.354635023 | -0.24211899  | -0.122690762 | 9.70E-05    |
| Lym-IL10     | -0.452264371 | -0.348584384 | -0.23560871  | 1.14E-08    |
| Lym-TNFα     | -0.298440669 | -0.182043192 | -0.060309991 | 0.003598749 |
| Lym-T cells  | 0.475503724  | 0.595711605  | 0.694081379  | 1.61E-14    |
| Lym-B cells  | 0.388714405  | 0.522374509  | 0.634501163  | 5.87E-11    |
| Lym-Th cells | 0.460027492  | 0.582779374  | 0.683671991  | 7.94E-14    |
| Lym-Ts cells | 0.351941218  | 0.490693061  | 0.608343786  | 1.15E-09    |
| Lym-NK cells | 0.320982285  | 0.463733294  | 0.585881684  | 1.15E-08    |
| Lym-Th/Tr    | -0.230719952 | -0.065540577 | 0.103310517  | 0.446703368 |
| Lym-NLR      | -0.828126156 | -0.786757312 | -0.736864485 | 1.01E-58    |
| Mono-Plat    | 0.204147289  | 0.315224695  | 0.418288391  | 1.03E-07    |
| Mono-Glu     | -0.228888372 | -0.111463996 | 0.009157637  | 0.070052053 |
| Mono-LDH     | -0.310755467 | -0.198967781 | -0.081750849 | 0.000990289 |
| Mono-CRP     | -0.172815327 | -0.048796678 | 0.076745079  | 0.446118541 |
| Mono-IL1β    | -0.180343191 | -0.058558492 | 0.064994514  | 0.352649004 |
| Mono-IL2R    | -0.155041969 | -0.032579136 | 0.0908698    | 0.605294274 |
| Mono-IL6     | -0.200805391 | -0.079934614 | 0.043333453  | 0.203295377 |
| Mono-IL8     | -0.205992273 | -0.085064489 | 0.038422347  | 0.176545335 |

|               |              |              |              |             |
|---------------|--------------|--------------|--------------|-------------|
| Mono-IL10     | -0.363785982 | -0.251984395 | -0.13302569  | 4.87E-05    |
| Mono-TNFα     | -0.092931313 | 0.030502132  | 0.15301222   | 0.628500268 |
| Mono-T cells  | -0.057681642 | 0.1111108724 | 0.273723469  | 0.196154807 |
| Mono-B cells  | -0.153162789 | 0.014936381  | 0.182195458  | 0.86246777  |
| Mono-Th cells | -0.06095876  | 0.107859453  | 0.270678449  | 0.209639075 |
| Mono-Ts cells | -0.096811413 | 0.07207433   | 0.236925862  | 0.402610572 |
| Mono-NK cells | 0.094972956  | 0.258569831  | 0.40856732   | 0.002282262 |
| Mono-Th/Tr    | -0.225883983 | -0.060458936 | 0.108355263  | 0.482796339 |
| Mono-NLR      | -0.140819465 | -0.022478125 | 0.096496501  | 0.711574609 |
| Plat-Glu      | -0.198761032 | -0.08018281  | 0.040709154  | 0.19318753  |
| Plat-LDH      | -0.292721149 | -0.179838697 | -0.06201246  | 0.002967401 |
| Plat-CRP      | -0.260669245 | -0.140165667 | -0.015361602 | 0.027943556 |
| Plat-IL1β     | -0.031015796 | 0.092421578  | 0.213082175  | 0.141876789 |
| Plat-IL2R     | -0.336926976 | -0.223094258 | -0.10283346  | 0.000339325 |
| Plat-IL6      | -0.370343782 | -0.259297706 | -0.140944626 | 2.76E-05    |
| Plat-IL8      | -0.31150423  | -0.19593198  | -0.074647648 | 0.001702746 |
| Plat-IL10     | -0.430712339 | -0.324849365 | -0.210168167 | 1.18E-07    |
| Plat-TNFα     | -0.189560101 | -0.068063607 | 0.055485779  | 0.279849013 |
| Plat-T cells  | 0.086275169  | 0.250367913  | 0.401235299  | 0.003169766 |
| Plat-B cells  | -0.040679318 | 0.127908835  | 0.289415692  | 0.136344605 |
| Plat-Th cells | 0.092154108  | 0.255914269  | 0.406195526  | 0.002541269 |
| Plat-Ts cells | -0.000819574 | 0.166918857  | 0.325521413  | 0.051231731 |
| Plat-NK cells | 0.12403656   | 0.285806459  | 0.432777134  | 0.000710406 |
| Plat-Th/Tr    | -0.214590896 | -0.048625449 | 0.120069233  | 0.572573551 |
| Plat-NLR      | -0.293338811 | -0.180922185 | -0.063570465 | 0.002696182 |
| Glu-LDH       | 0.260027065  | 0.368964956  | 0.468628475  | 5.72E-10    |
| Glu-CRP       | 0.161398825  | 0.281768575  | 0.393877808  | 8.54E-06    |
| Glu-IL1β      | -0.172211655 | -0.049446828 | 0.074830507  | 0.435419114 |
| Glu-IL2R      | 0.113937183  | 0.234448857  | 0.34816118   | 0.000178106 |
| Glu-IL6       | 0.143169882  | 0.262105582  | 0.373578544  | 2.51E-05    |
| Glu-IL8       | 0.073372412  | 0.19541626   | 0.31169362   | 0.001867291 |
| Glu-IL10      | 0.092955184  | 0.214307767  | 0.329386546  | 0.000630541 |
| Glu-TNFα      | 0.039779777  | 0.162797107  | 0.280953011  | 0.009778215 |
| Glu-T cells   | -0.314851622 | -0.154718819 | 0.013978113  | 0.072096612 |
| Glu-B cells   | -0.359343594 | -0.203308723 | -0.036215255 | 0.01759983  |
| Glu-Th cells  | -0.329934142 | -0.171104174 | -0.00285348  | 0.046404491 |
| Glu-Ts cells  | -0.292004322 | -0.130064628 | 0.03912486   | 0.131242784 |
| Glu-NK cells  | -0.361281861 | -0.20544313  | -0.038439598 | 0.01642214  |
| Glu-Th/Tr     | -0.160791225 | 0.007751462  | 0.175854884  | 0.928633889 |
| Glu-NLR       | 0.254429     | 0.363774898  | 0.463937136  | 1.03E-09    |
| LDH-CRP       | 0.560992456  | 0.641236854  | 0.709542926  | 8.95E-30    |
| LDH-IL1β      | -0.085554731 | 0.03792923   | 0.160265579  | 0.547355601 |
| LDH-IL2R      | 0.363538042  | 0.465780803  | 0.556935978  | 4.41E-15    |
| LDH-IL6       | 0.432966245  | 0.527740062  | 0.610973836  | 1.09E-19    |
| LDH-IL8       | 0.220818218  | 0.334803051  | 0.439765276  | 4.55E-08    |
| LDH-IL10      | 0.353918502  | 0.457091286  | 0.549273242  | 1.62E-14    |
| LDH-TNFα      | 0.155644727  | 0.273489904  | 0.383659558  | 9.79E-06    |
| LDH-T cells   | -0.441461786 | -0.295635116 | -0.134593102 | 0.000452594 |
| LDH-B cells   | -0.444817469 | -0.299441121 | -0.138690813 | 0.000378442 |
| LDH-Th cells  | -0.456522867 | -0.312753662 | -0.153067099 | 0.000198486 |
| LDH-Ts cells  | -0.460713657 | -0.317533616 | -0.158245543 | 0.000156255 |
| LDH-NK cells  | -0.542988753 | -0.412872591 | -0.263395992 | 5.34E-07    |
| LDH-Th/Tr     | 0.002304768  | 0.169954561  | 0.328311844  | 0.047087825 |
| LDH-NLR       | 0.542103846  | 0.621136943  | 0.689277481  | 2.62E-30    |
| CRP-IL1β      | -0.14542521  | -0.019415557 | 0.107213939  | 0.764275024 |
| CRP-IL2R      | 0.481398559  | 0.572913195  | 0.652071612  | 2.01E-22    |
| CRP-IL6       | 0.598081846  | 0.673398183  | 0.736924217  | 2.48E-33    |
| CRP-IL8       | 0.185596633  | 0.304814218  | 0.415188323  | 1.42E-06    |
| CRP-IL10      | 0.290747732  | 0.402332192  | 0.503119402  | 8.60E-11    |
| CRP-TNFα      | 0.231822851  | 0.347994918  | 0.454380058  | 2.88E-08    |
| CRP-T cells   | -0.371111163 | -0.210506911 | -0.037673903 | 0.017524269 |
| CRP-B cells   | -0.480777078 | -0.334586905 | -0.170298984 | 0.000120681 |
| CRP-Th cells  | -0.362229646 | -0.200678997 | -0.027423104 | 0.023682471 |
| CRP-Ts cells  | -0.452771691 | -0.302411073 | -0.135326009 | 0.00054911  |
| CRP-NK cells  | -0.468120687 | -0.320003441 | -0.154396285 | 0.000244911 |
| CRP-Th/Tr     | 0.036474704  | 0.209358986  | 0.370075705  | 0.018163426 |
| CRP-NLR       | 0.455269977  | 0.549077682  | 0.63082888   | 8.98E-21    |

|                  |              |              |              |             |
|------------------|--------------|--------------|--------------|-------------|
| IL1β-IL2R        | 0.097645631  | 0.218108802  | 0.332273203  | 0.000463198 |
| IL1β-IL6         | 0.019604233  | 0.142345306  | 0.260859464  | 0.023269103 |
| IL1β-IL8         | 0.138679772  | 0.257371166  | 0.368773553  | 3.30E-05    |
| IL1β-IL10        | 0.23826096   | 0.351050516  | 0.454496762  | 8.86E-09    |
| IL1β-IL1β        | 0.194737409  | 0.310382352  | 0.417516408  | 4.48E-07    |
| IL1β-T cells     | -0.232919948 | -0.065281518 | 0.1061246    | 0.455333142 |
| IL1β-B cells     | -0.17655065  | -0.006519803 | 0.163888879  | 0.940627601 |
| IL1β-Th cells    | -0.255133695 | -0.088761885 | 0.082714696  | 0.309631119 |
| IL1β-Ts cells    | -0.164512763 | 0.005878656  | 0.175929394  | 0.946457039 |
| IL1β-NK cells    | -0.089577396 | 0.081898218  | 0.248658395  | 0.348678144 |
| IL1β-Th/Tr       | -0.226240684 | -0.058257519 | 0.113090792  | 0.505358307 |
| IL1β-NLR         | -0.125541369 | -0.00249538  | 0.120626219  | 0.968432989 |
| IL2R-IL6         | 0.442484092  | 0.536357051  | 0.618603114  | 2.54E-20    |
| IL2R-IL8         | 0.489033183  | 0.577364746  | 0.653974786  | 5.59E-24    |
| IL2R-IL10        | 0.376313081  | 0.477290341  | 0.56706168   | 7.41E-16    |
| IL2R-TNFα        | 0.596645954  | 0.670491049  | 0.733076896  | 1.59E-34    |
| IL2R-T cells     | -0.447256428 | -0.299859444 | -0.136605562 | 0.000453951 |
| IL2R-B cells     | -0.449953798 | -0.30292966  | -0.139917984 | 0.000393759 |
| IL2R-Th cells    | -0.415687845 | -0.264152827 | -0.098348358 | 0.002123689 |
| IL2R-Ts cells    | -0.446944631 | -0.299504745 | -0.136223117 | 0.000461427 |
| IL2R-NK cells    | -0.405296346 | -0.252489377 | -0.08595706  | 0.003367615 |
| IL2R-Th/Tr       | -0.07566209  | 0.095798559  | 0.261756757  | 0.27268546  |
| IL2R-NLR         | 0.388667093  | 0.488387704  | 0.576799138  | 1.25E-16    |
| IL6-IL8          | 0.361958524  | 0.464355345  | 0.55568002   | 5.47E-15    |
| IL6-IL10         | 0.453609834  | 0.546198814  | 0.627122756  | 3.73E-21    |
| IL6-TNFα         | 0.416599225  | 0.513360238  | 0.598619959  | 1.76E-18    |
| IL6-T cells      | -0.548638761 | -0.417393619 | -0.266071638 | 5.79E-07    |
| IL6-B cells      | -0.53512233  | -0.401465937 | -0.248201286 | 1.67E-06    |
| IL6-Th cells     | -0.504656015 | -0.365858669 | -0.208624812 | 1.49E-05    |
| IL6-Ts cells     | -0.5691189   | -0.441681939 | -0.293524078 | 1.03E-07    |
| IL6-NK cells     | -0.506003038 | -0.367424453 | -0.210354379 | 1.36E-05    |
| IL6-Th/Tr        | 0.024669947  | 0.194081694  | 0.352657423  | 0.025191024 |
| IL6-NLR          | 0.383072279  | 0.483177668  | 0.57206541   | 2.54E-16    |
| IL8-IL10         | 0.319854695  | 0.426161615  | 0.52187194   | 1.25E-12    |
| IL8-TNFα         | 0.578826895  | 0.655229826  | 0.720228876  | 1.54E-32    |
| IL8-T cells      | -0.439754181 | -0.291336221 | -0.127429048 | 0.000668331 |
| IL8-B cells      | -0.414917158 | -0.263286282 | -0.097425964 | 0.002199254 |
| IL8-Th cells     | -0.385715168 | -0.230631418 | -0.062872998 | 0.007567751 |
| IL8-Ts cells     | -0.481352404 | -0.338894299 | -0.17899344  | 6.60E-05    |
| IL8-NK cells     | -0.454941072 | -0.308614352 | -0.146060781 | 0.000301334 |
| IL8-Th/Tr        | 0.055404164  | 0.22352285   | 0.379316797  | 0.009702172 |
| IL8-NLR          | 0.191272501  | 0.307126467  | 0.414540345  | 5.98E-07    |
| IL10-TNFα        | 0.41840713   | 0.514970956  | 0.600023063  | 1.32E-18    |
| IL10-T cells     | -0.432824748 | -0.283484643 | -0.119000417 | 0.000944536 |
| IL10-B cells     | -0.366014622 | -0.208797034 | -0.03999166  | 0.015870439 |
| IL10-Th cells    | -0.390445695 | -0.235897683 | -0.068418305 | 0.006266243 |
| IL10-Ts cells    | -0.430709148 | -0.281091489 | -0.116436084 | 0.001047508 |
| IL10-NK cells    | -0.5325219   | -0.398410852 | -0.24478546  | 2.04E-06    |
| IL10-Th/Tr       | -0.003501049 | 0.166825166  | 0.327744628  | 0.054954865 |
| IL10-NLR         | 0.229387347  | 0.342793452  | 0.447017193  | 2.06E-08    |
| TNFα-T cells     | -0.369954065 | -0.21315067  | -0.044539965 | 0.013764654 |
| TNFα-B cells     | -0.368775733 | -0.211847796 | -0.043178101 | 0.014367649 |
| TNFα-Th cells    | -0.32220633  | -0.16079907  | 0.009693042  | 0.064461915 |
| TNFα-Ts cells    | -0.37543781  | -0.219221363 | -0.050893793 | 0.011237126 |
| TNFα-NK cells    | -0.400082291 | -0.246653788 | -0.079776583 | 0.004209016 |
| TNFα-Th/Tr       | -0.099570862 | 0.071874169  | 0.239174679  | 0.411001146 |
| TNFα-NLR         | 0.169107663  | 0.286234375  | 0.395388964  | 3.54E-06    |
| T cells-B cells  | 0.338390257  | 0.478925167  | 0.598562239  | 3.22E-09    |
| T cells-Th cells | 0.91342187   | 0.937514785  | 0.955060603  | 9.28E-64    |
| T cells-Ts cells | 0.787134576  | 0.8434962    | 0.885887507  | 2.95E-38    |
| T cells-NK cells | 0.218862306  | 0.372890261  | 0.508786509  | 7.21E-06    |
| T cells-Th/Tr    | -0.222730178 | -0.057149528 | 0.111635975  | 0.507118283 |
| T cells-NLR      | -0.651930427 | -0.543657852 | -0.4136598   | 6.65E-12    |
| B cells-Th cells | 0.377718061  | 0.512939272  | 0.626737844  | 1.47E-10    |
| B cells-Ts cells | 0.194294605  | 0.350585828  | 0.48951829   | 2.67E-05    |
| B cells-NK cells | 0.230179043  | 0.383104923  | 0.517565468  | 3.83E-06    |
| B cells-Th/Tr    | -0.122629535 | 0.046032702  | 0.212110612  | 0.593240915 |

|                   |              |              |              |             |
|-------------------|--------------|--------------|--------------|-------------|
| B cells-NLR       | -0.57944334  | -0.456047265 | -0.312211657 | 2.14E-08    |
| Th cells-Ts cells | 0.581297654  | 0.6824767    | 0.762872359  | 4.17E-20    |
| Th cells-NK cell  | 0.230957212  | 0.383805938  | 0.518166918  | 3.66E-06    |
| Th cells-Th/Tr    | 0.026408644  | 0.19326812   | 0.349650032  | 0.023648236 |
| Th cells-NLR      | -0.640003659 | -0.529078698 | -0.396551045 | 3.00E-11    |
| Ts cells-NK cell: | 0.220321274  | 0.374209247  | 0.509921699  | 6.65E-06    |
| Ts cells-Th/Tr    | -0.5927433   | -0.471944908 | -0.330379798 | 5.82E-09    |
| Ts cells-NLR      | -0.623271439 | -0.508735198 | -0.372830655 | 2.19E-10    |
| NK cells-Th/Tr    | -0.288835471 | -0.127285994 | 0.041311402  | 0.138279258 |
| NK cells-NLR      | -0.59586394  | -0.475686471 | -0.334671034 | 4.25E-09    |
| Th/Tr-NLR         | -0.061368291 | 0.107453149  | 0.270297456  | 0.211370792 |
